CORRECTION

# Correction: Molecular Paleoclimate Reconstructions over the Last 9 ka from a Peat Sequence in South China

Xinxin Wang, Xianyu Huang, Dirk Sachse, Weihua Ding, Jiantao Xue

In [Fig 4](#), the curve of hopanoids from a. Dajiuhu peat was plotted incorrectly. The y-axis scale of oxygen isotope values from c. Dongge should shift up by .5, so that the lower value is 6.5 and the upper value is 9.5. Please see the corrected [Fig 4](#) here.

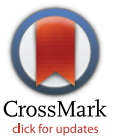

 OPEN ACCESS

**Citation:** Wang X, Huang X, Sachse D, Ding W, Xue J (2016) Correction: Molecular Paleoclimate Reconstructions over the Last 9 ka from a Peat Sequence in South China. PLoS ONE 11(9): e0163650. doi:10.1371/journal.pone.0163650

**Published:** September 21, 2016

**Copyright:** © 2016 Wang et al. This is an open access article distributed under the terms of the [Creative Commons Attribution License](#), which permits unrestricted use, distribution, and reproduction in any medium, provided the original author and source are credited.

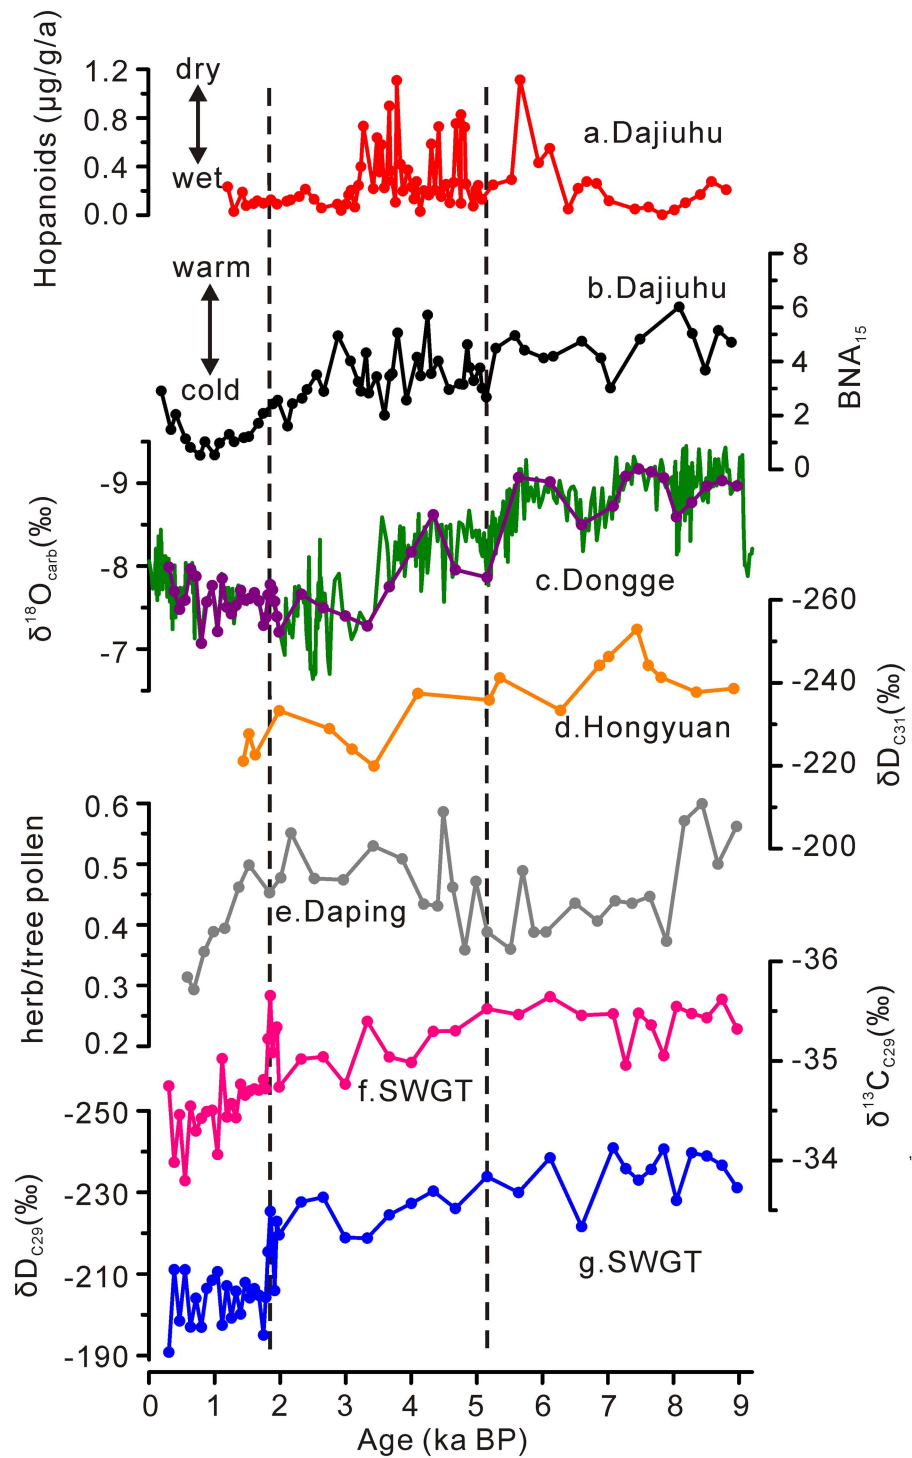

**Fig 4. Comparisons of records.** (a) Mass accumulation rate of hopanoids in the Dajihu peatland [26]. (b) BNA15 record from the Dajihu peatland[24], (c)  $\delta^{18}\text{O}_{\text{carb}}$  record from Dongge Cave [30], (d)  $\delta\text{D}_{\text{C}31}$  record from the Hongyuan peat sequence [19], (e) ratios of total herb pollen over total tree pollen from the Daping sedimentary sequence [29], (f)  $\delta^{13}\text{C}_{\text{C}29}$  record (this study) and (g)  $\delta\text{D}_{\text{C}29}$  record (this study).

doi:10.1371/journal.pone.0163650.g001

## Reference

1. Wang X, Huang X, Sachse D, Ding W, Xue J (2016) Molecular Paleoclimate Reconstructions over the Last 9 ka from a Peat Sequence in South China. PLoS ONE 11(8): e0160934. doi: [10.1371/journal.pone.0160934](https://doi.org/10.1371/journal.pone.0160934) PMID: [27505008](https://pubmed.ncbi.nlm.nih.gov/27505008/)
